# Supplementary material for: Can Mitogenomes of the Northern Wheatear (Oenanthe oenanthe) Reconstruct Its Phylogeography and Reveal the Origin of Migrant Birds?
Source: PubMed Central journal article supplement (PMC7283232; doi:10.1038/s41598-020-66287-0), 2020-06-09
Supplement: 41598_2020_66287_MOESM1_ESM.pdf [file 41598_2020_66287_MOESM1_ESM.pdf]

# Can Mitogenomes of the Northern Wheatear (*Oenanthe oenanthe*) Reconstruct Its Phylogeography and Reveal the Origin of Migrant Birds?

**Erjia Wang**<sup>1,\*</sup>, **Dezhi Zhang**<sup>2,3</sup>, **Markus Santhosh Braun**<sup>1</sup>, **Agnes Hotz-Wagenblatt**<sup>4</sup>, **Tomas Pärt**<sup>5</sup>, **Debora Artl**<sup>5</sup>, **Heiko Schmaljohann**<sup>6,7</sup>, **Franz Bairlein**<sup>6</sup>, **Fumin Lei**<sup>2,3,8</sup>, and **Michael Wink**<sup>1,\*</sup>

1. Institute of Pharmacy and Molecular Biotechnology, Heidelberg University, Heidelberg, Germany
2. Key laboratory of Zoological Systematics and Evolution, Institute of Zoology, Chinese Academy of Sciences, Beijing, China
3. College of Life Sciences, University of Chinese Academy of Sciences, Beijing, China
4. Omics IT and Data Management Core Facility, German Cancer Research Center, Heidelberg University, Heidelberg, Germany
5. Department of Ecology, Swedish University of Agricultural Science, Uppsala, Sweden
6. Institute of Avian Research “Vogelwarte Helgoland”, Wilhelmshaven, Germany
7. Institute for Biology und Environmental Sciences (IBU), Carl von Ossietzky University of Oldenburg, Oldenburg, Germany
8. Center for Excellence in Animal Evolution and Genetics, Chinese Academy of Sciences, Kunming, China

\* Correspondence: [wang@uni-heidelberg.de](mailto:wang@uni-heidelberg.de) (E.W.); [wink@uni-heidelberg.de](mailto:wink@uni-heidelberg.de) (M.W.)

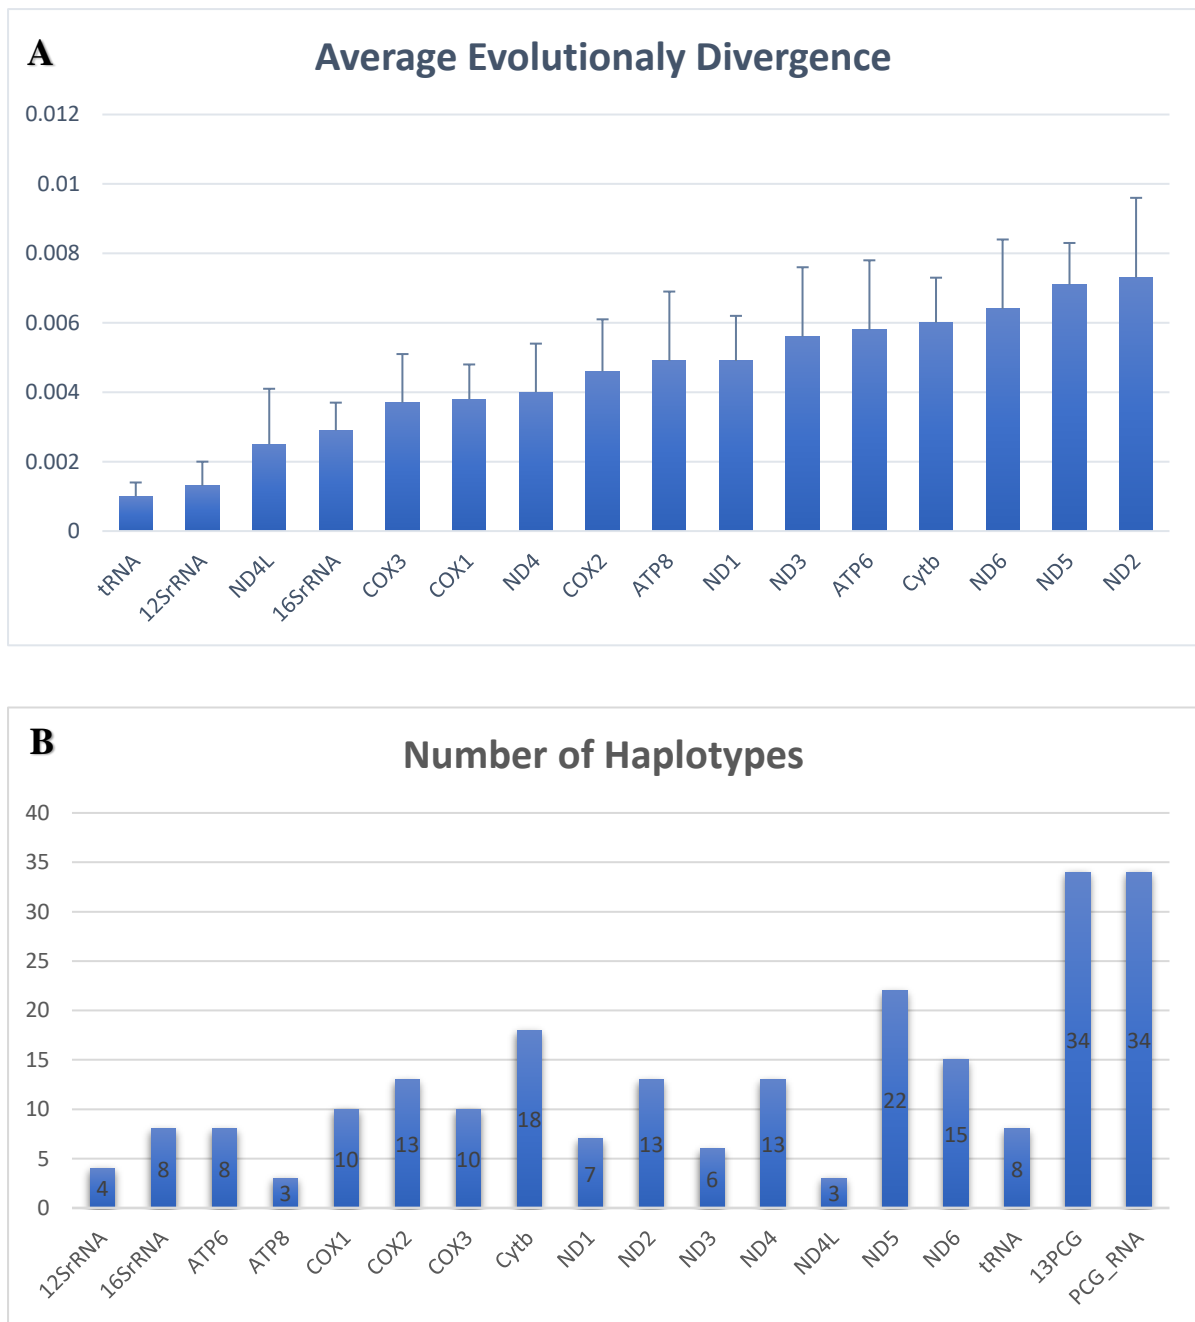

**Figure S1** Characteristics of mtDNA markers. (A) Estimation of average evolutionary divergence over all sequence pairs for each marker. The calculations were generated the by the Maximum Composite Likelihood model in MEGA X. (B) Number of haplotypes for each marker for 38 breeding samples.

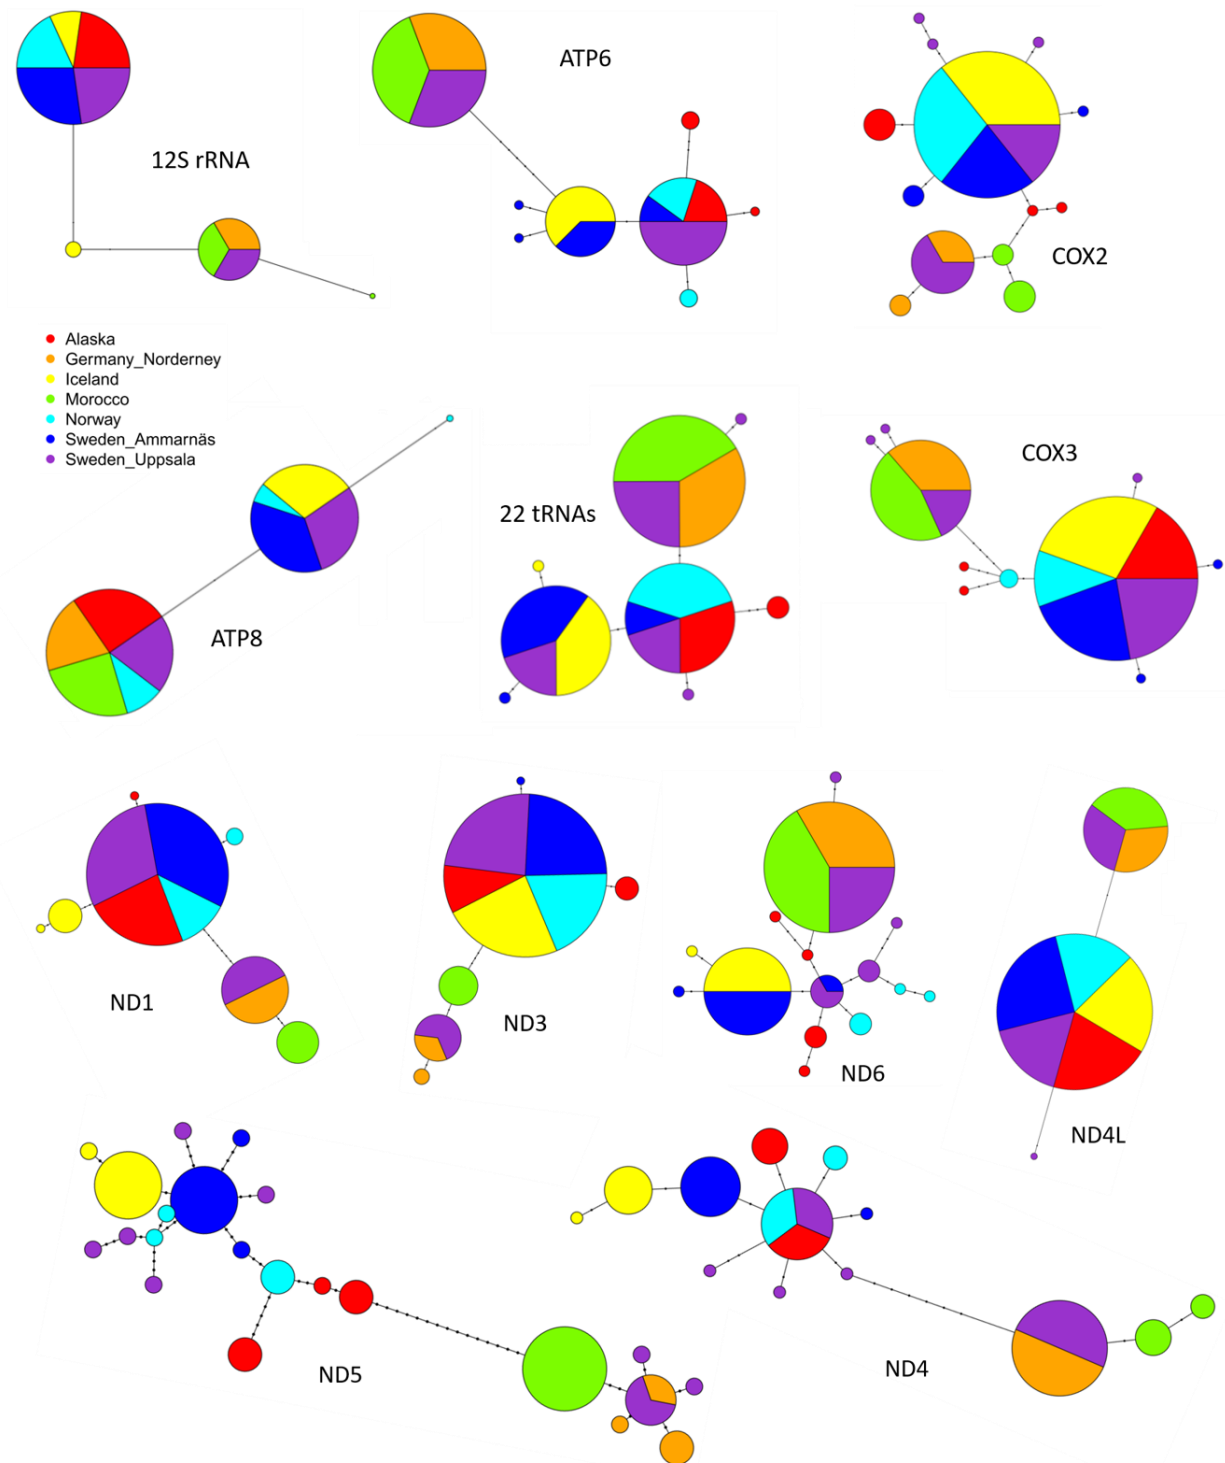

**Figure S2** Haplotype network of single mitochondrial markers for 38 individuals of *Oenanthe*. Size of the circles represents the frequency of haplotypes. The breeding areas are coded by the colors. Each dot indicates one mutation step. Samples from Morocco are black throat wheatears (*O. seebohmi*); samples from Iceland are Greenland wheatears (*O. o. leucorhoa*); samples from Alaska, Germany, Norway and Sweden are nominate wheatears (*O. o. oenanthe*). The classification of (sub)species are identified by the morphological data.

# 22tRNA

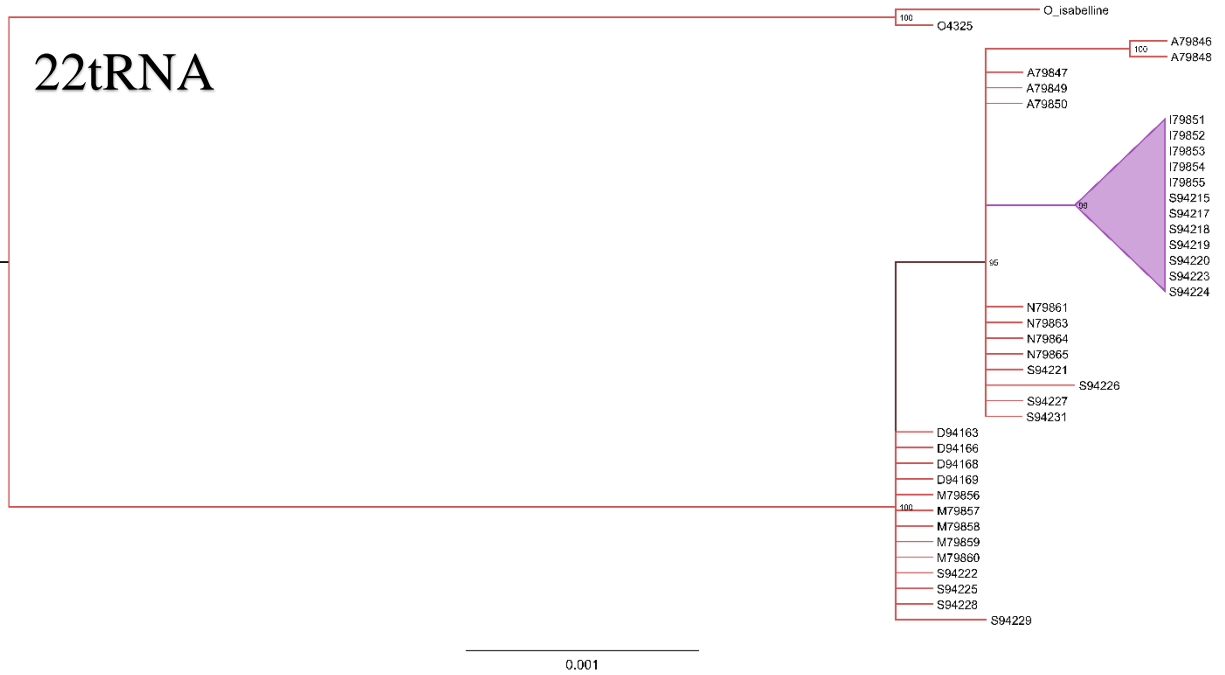

# 16SrRNA

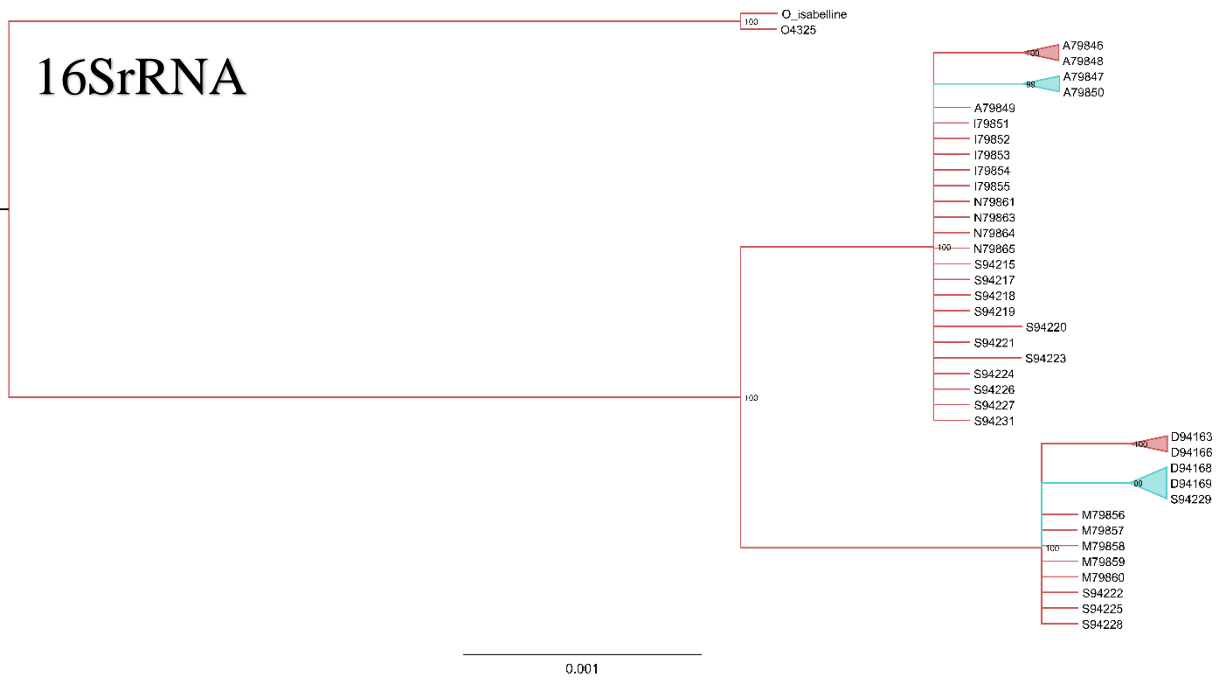

# COX1

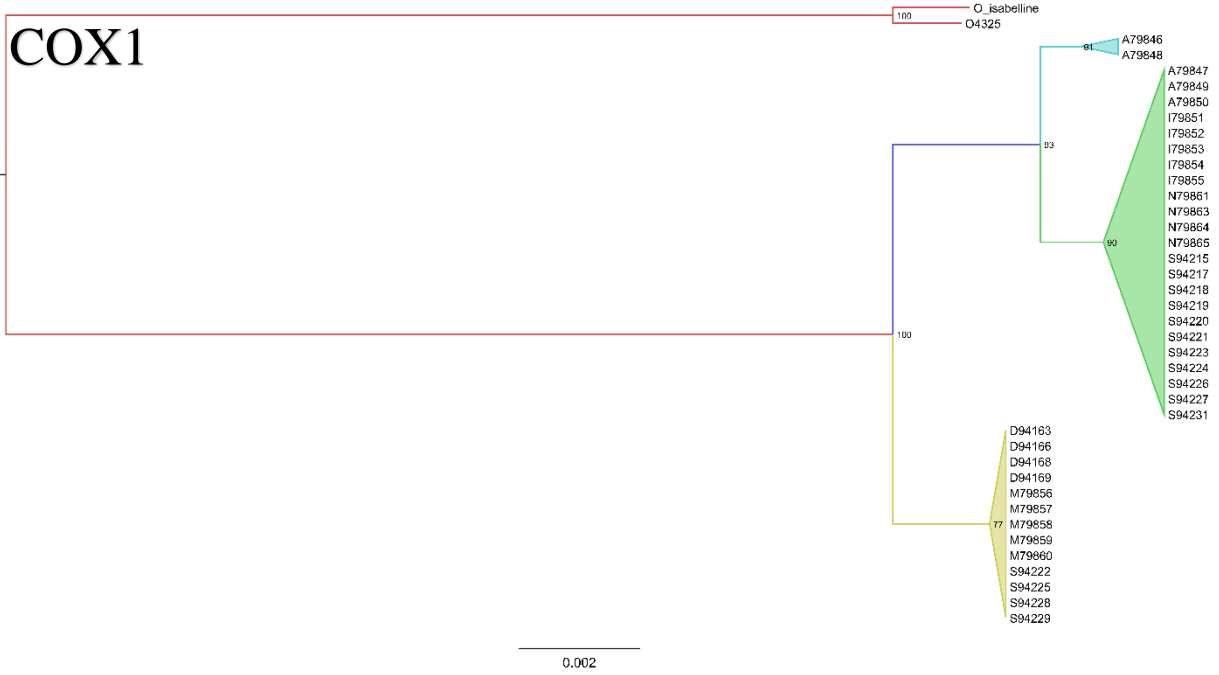

# COX2

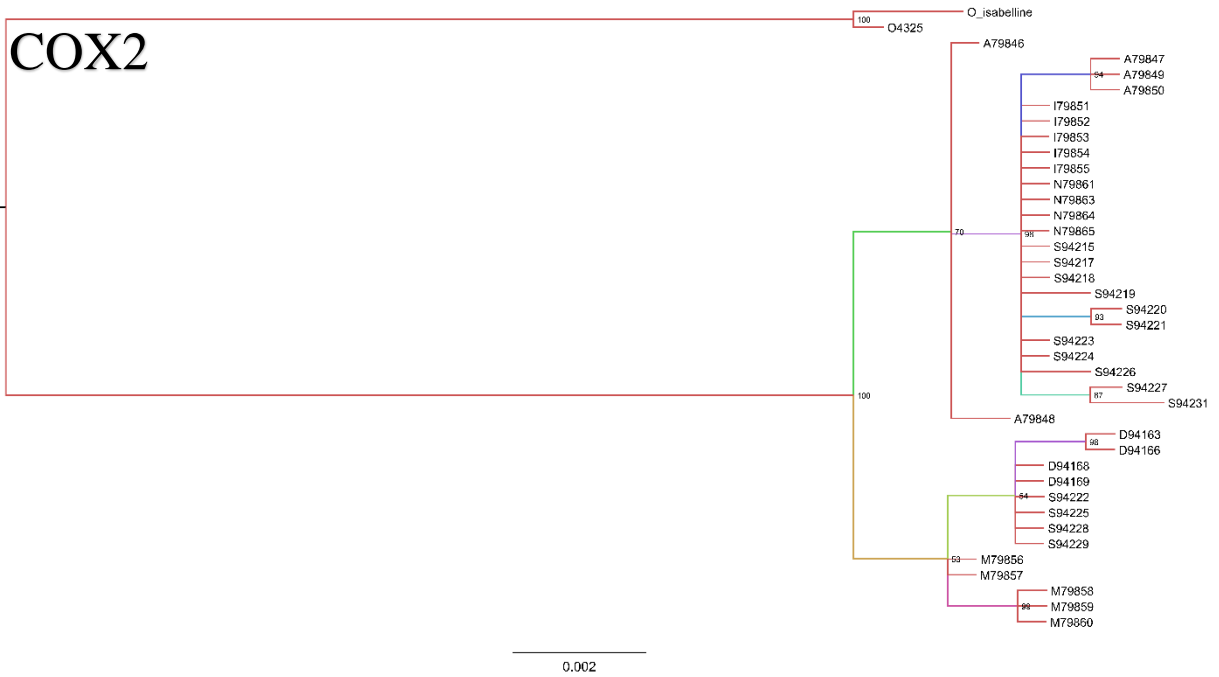

# COX3

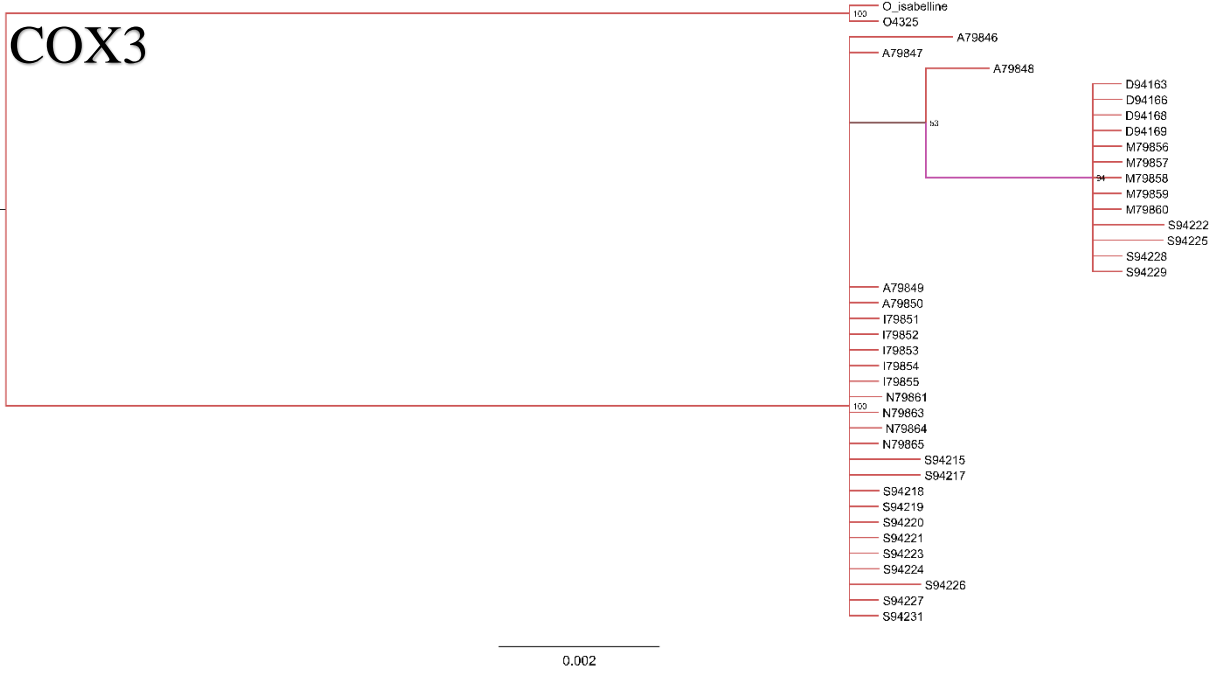

# Cytb

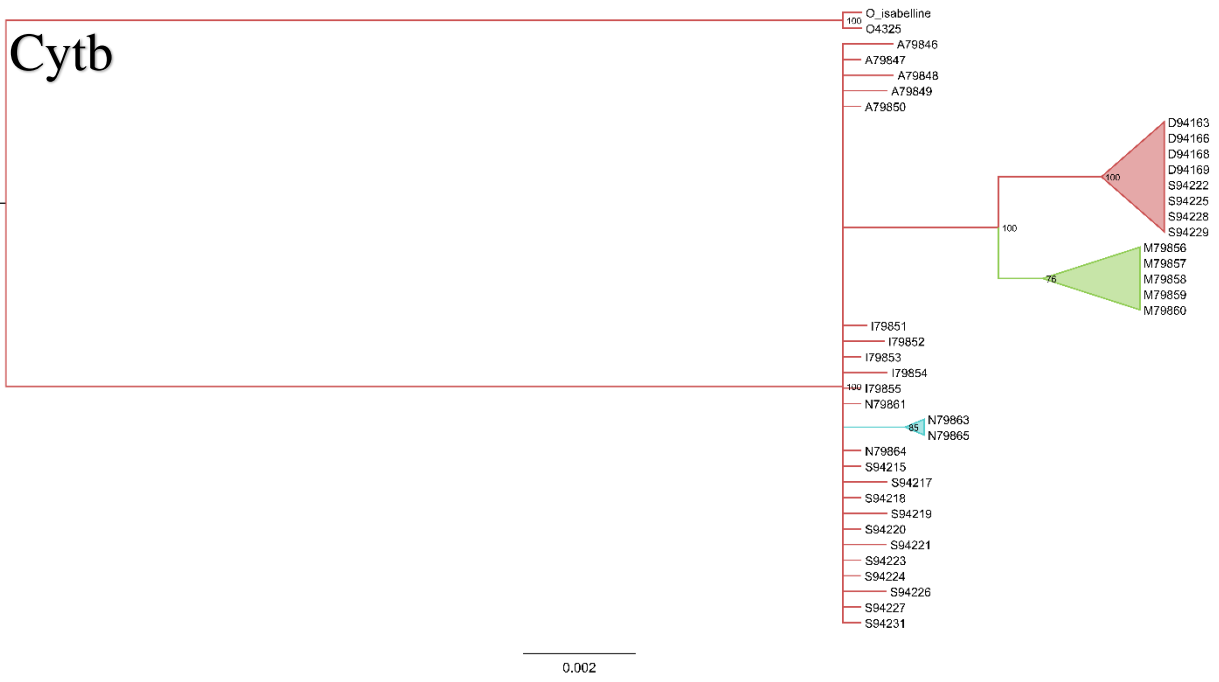

ND1

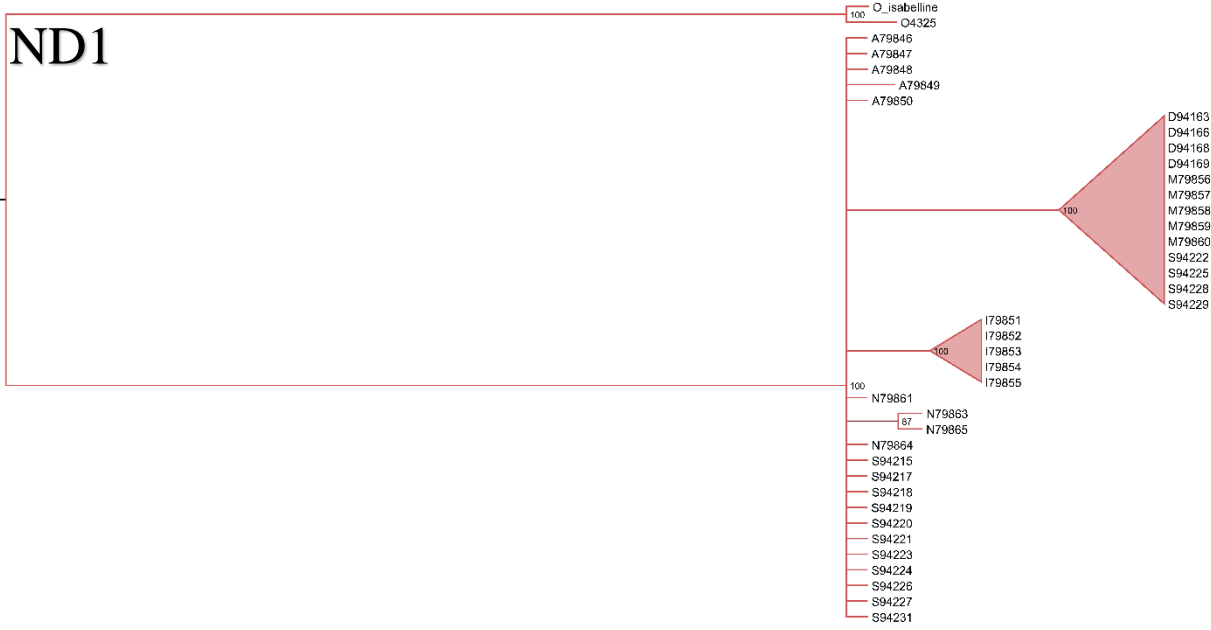

ND2

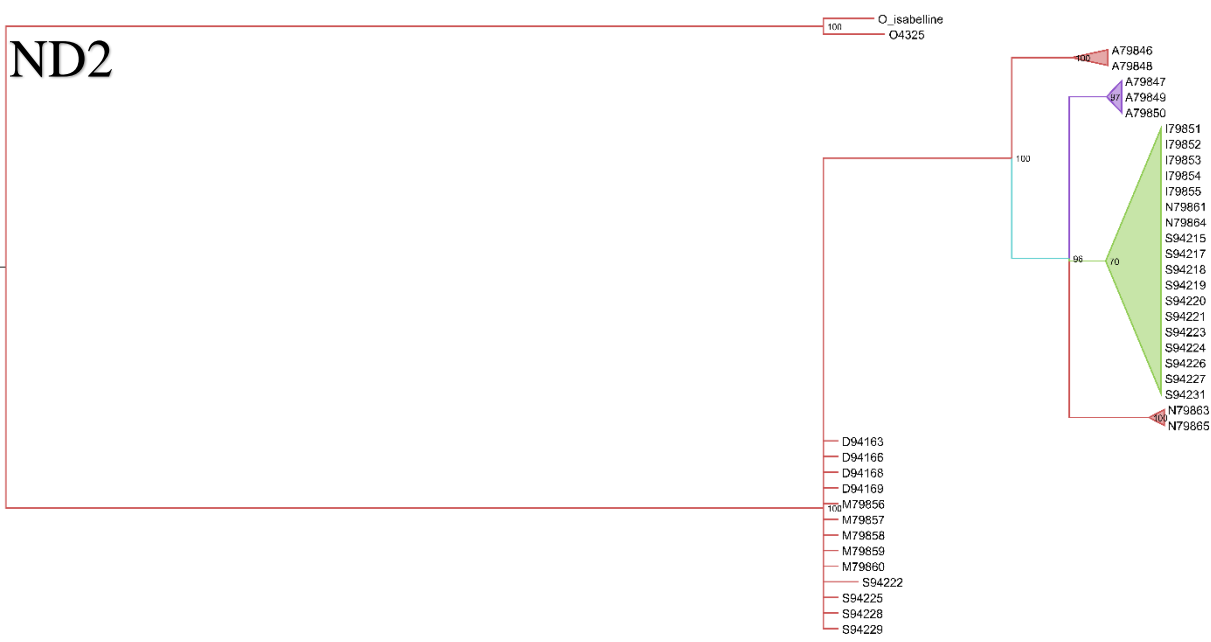

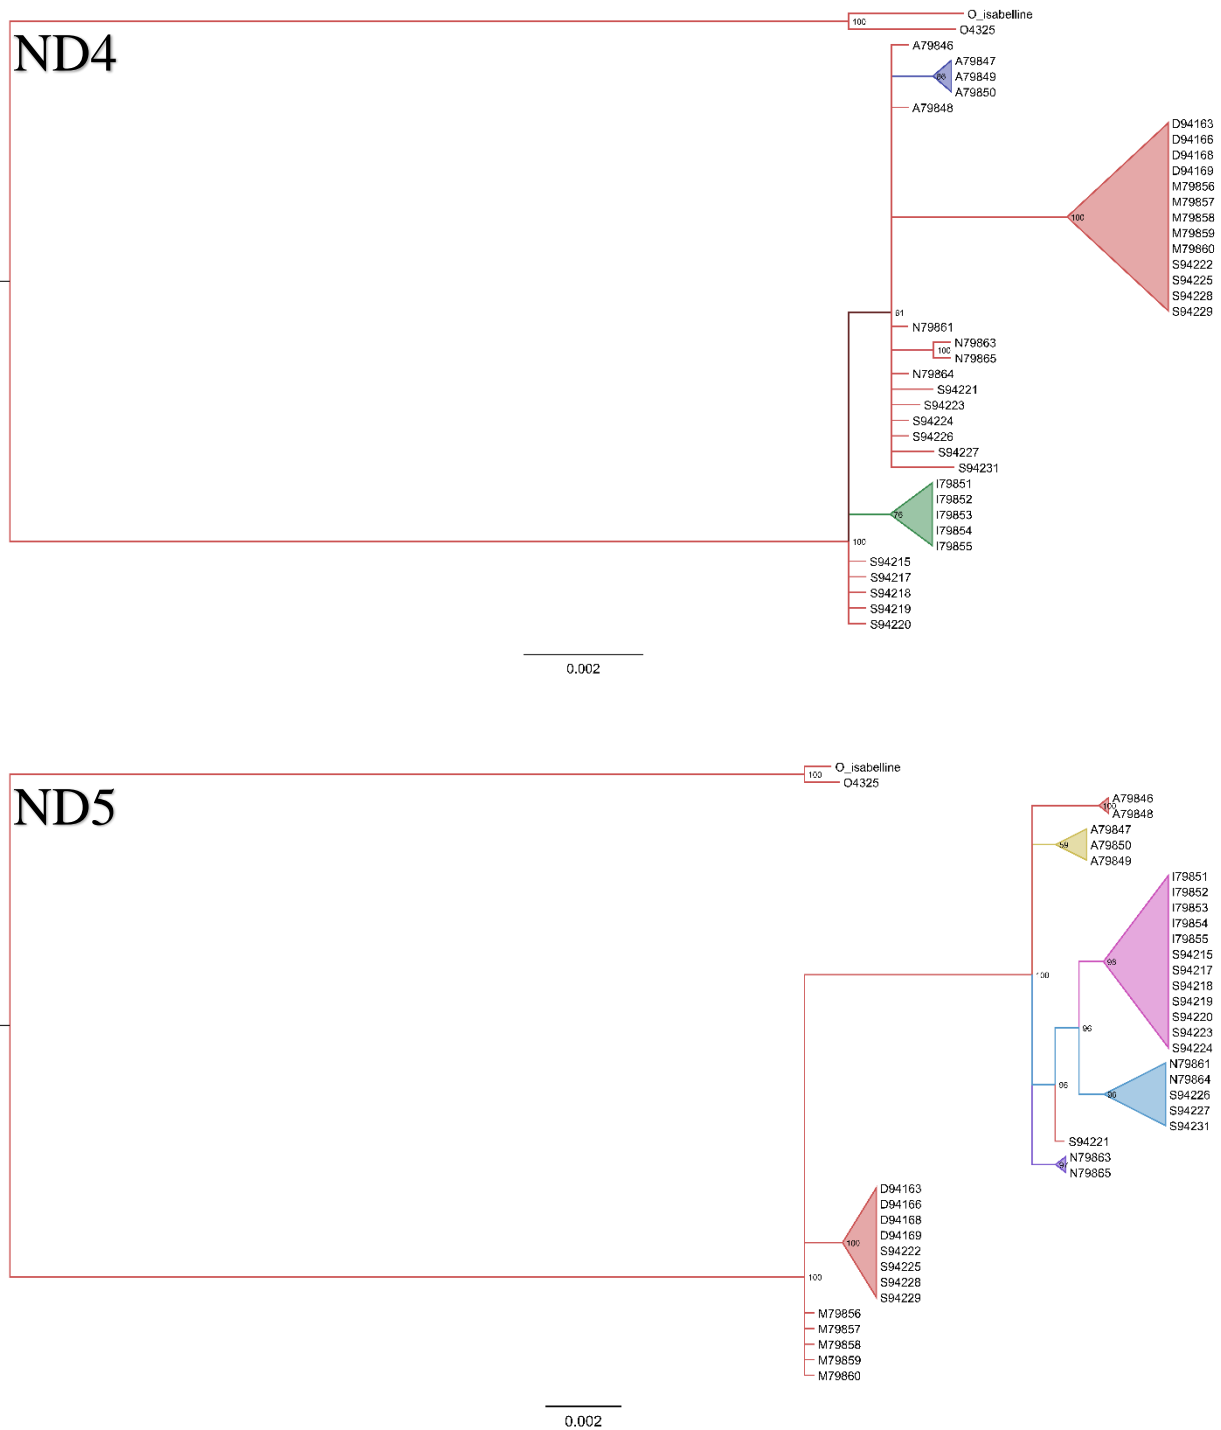

**Figure S3.** MrBayes reconstruction of the *Oenanthe oenanthe* and its outgroup *Oenanthe isabellina*. Numbers above nodes refer to the support values of Bayesian posterior probability. Sample names indicate the localities by the capital letter, ‘A’ refers to Alaska; ‘D’ refers to Germany; ‘I’ refers to Iceland; ‘M’ refers to Morocco; ‘N’ refers to Norway and ‘S’ refers to Sweden. Samples from Morocco are black throat wheatears (*O. seebohmi*); samples from Iceland are Greenland wheatears (*O. o. leucorhoa*); samples from Alaska, Germany, Norway and Sweden are nominate wheatears (*O. o. oenanthe*).



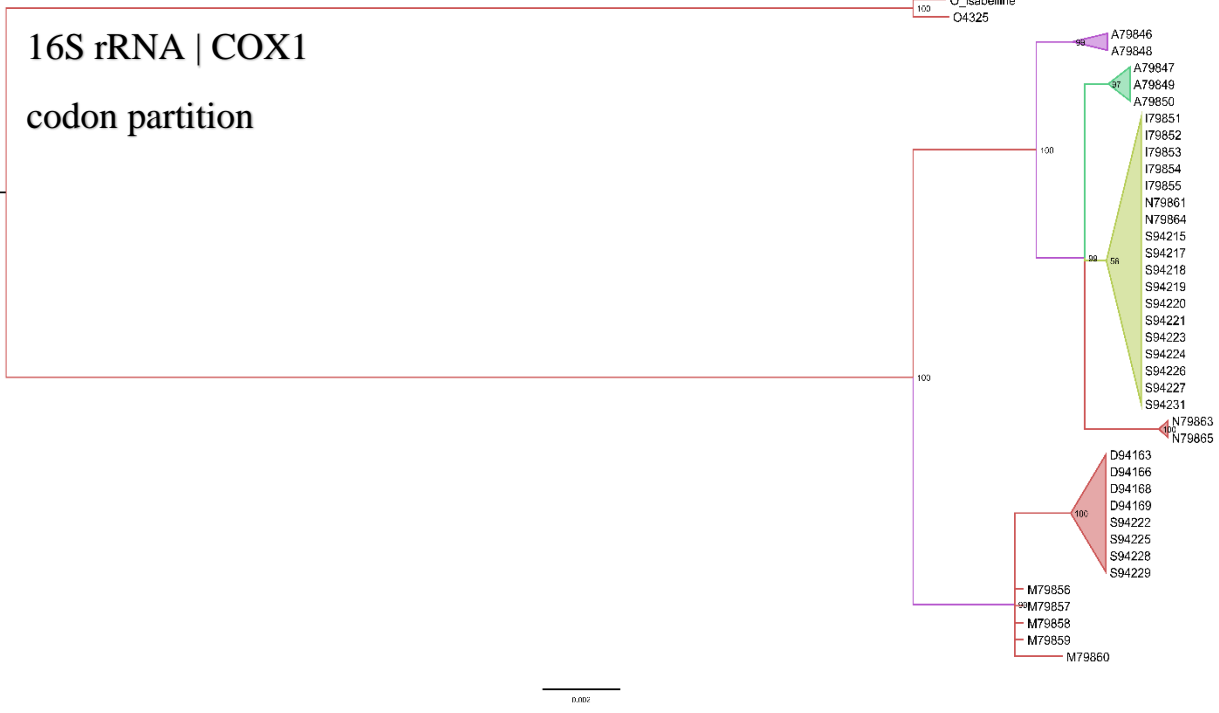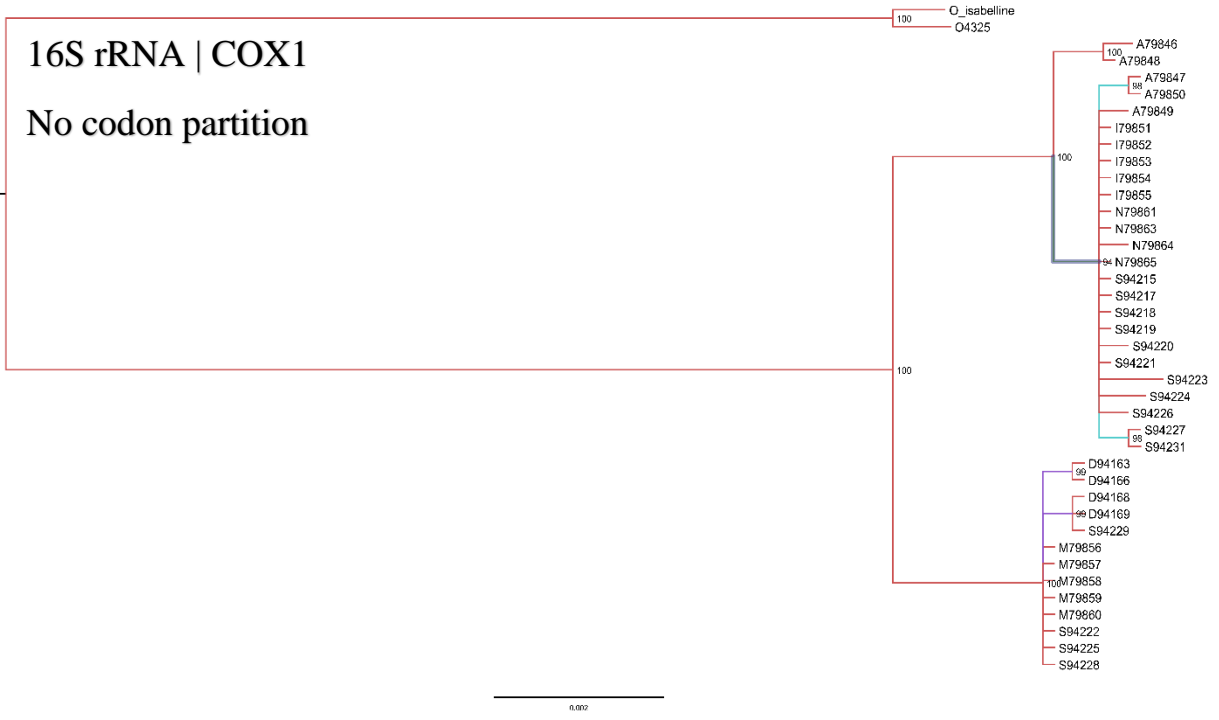

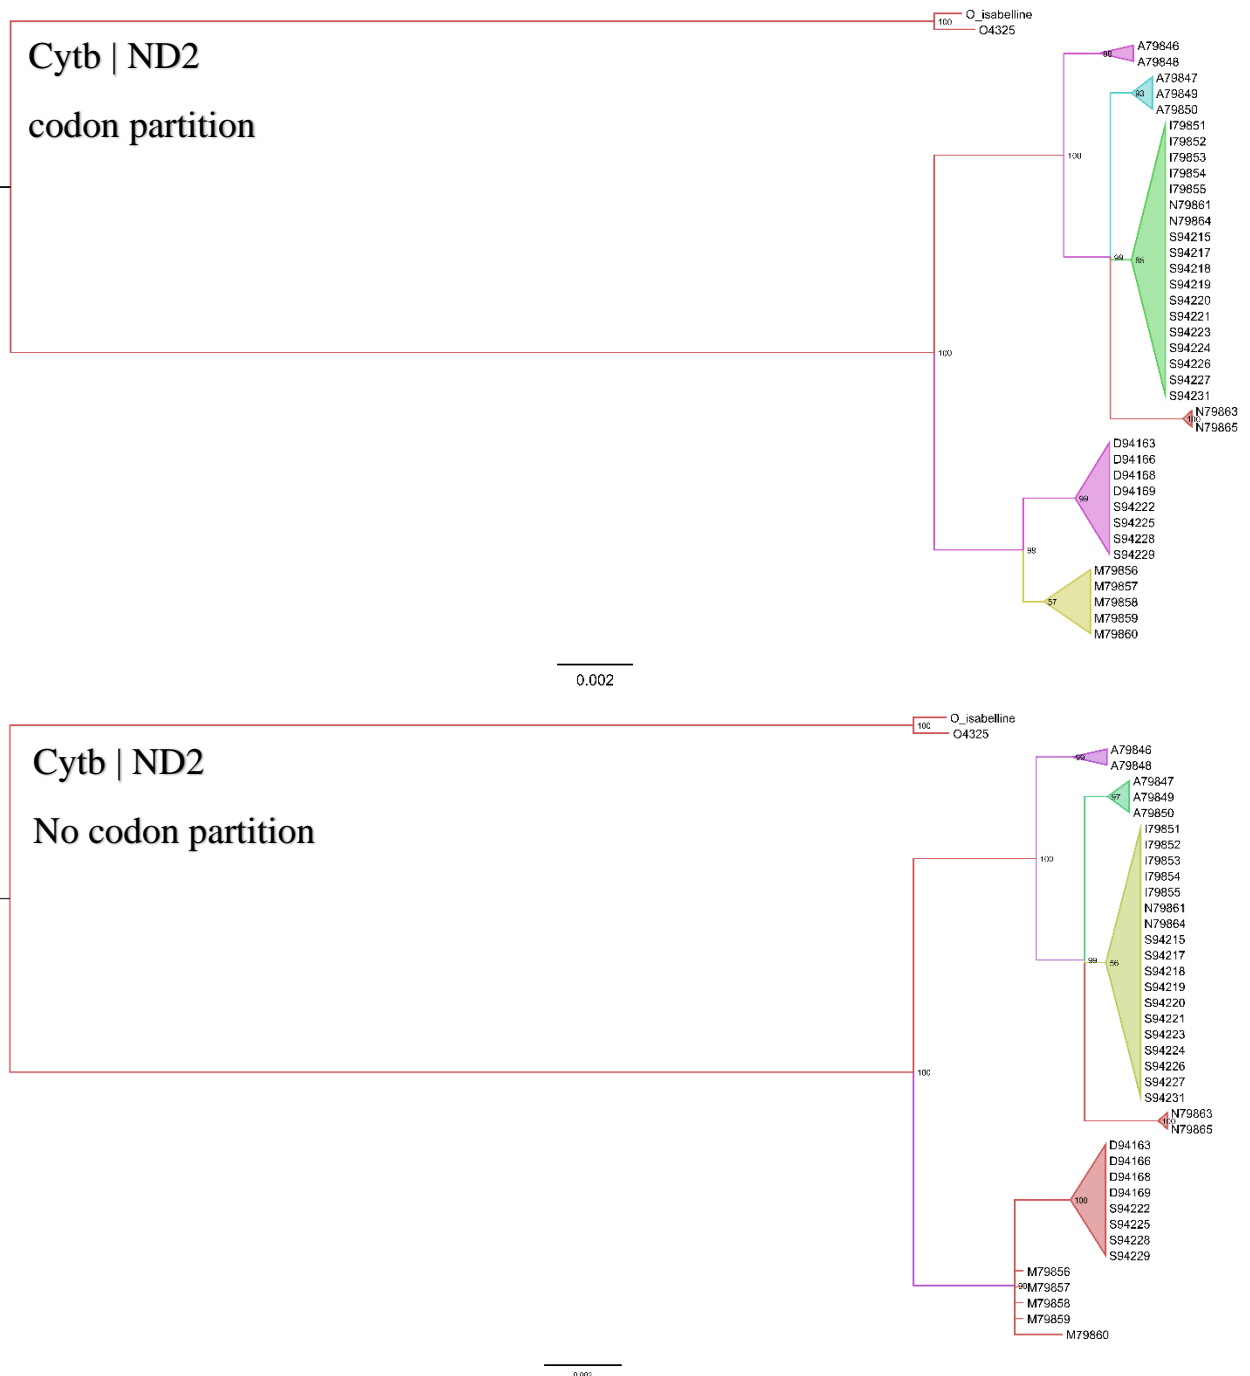

**Figure S4.** MrBayes reconstruction of the *Oenanthe oenanthe* and its outgroup *Oenanthe isabellina*. Numbers above nodes refer to the support values of Bayesian posterior probability. Sample names indicate the localities by the capital letter, ‘A’ refers to Alaska; ‘D’ refers to Germany; ‘I’ refers to Iceland; ‘M’ refers to Morocco; ‘N’ refers to Norway and ‘S’ refers to Sweden. Samples from Morocco are Seebohmi Wheatears (*O. seebohmi*); samples from Iceland are Greenland wheatears (*O. o. leucorhoa*); samples from Alaska, Germany, Norway and Sweden are nominate wheatears (*O. o. oenanthe*).

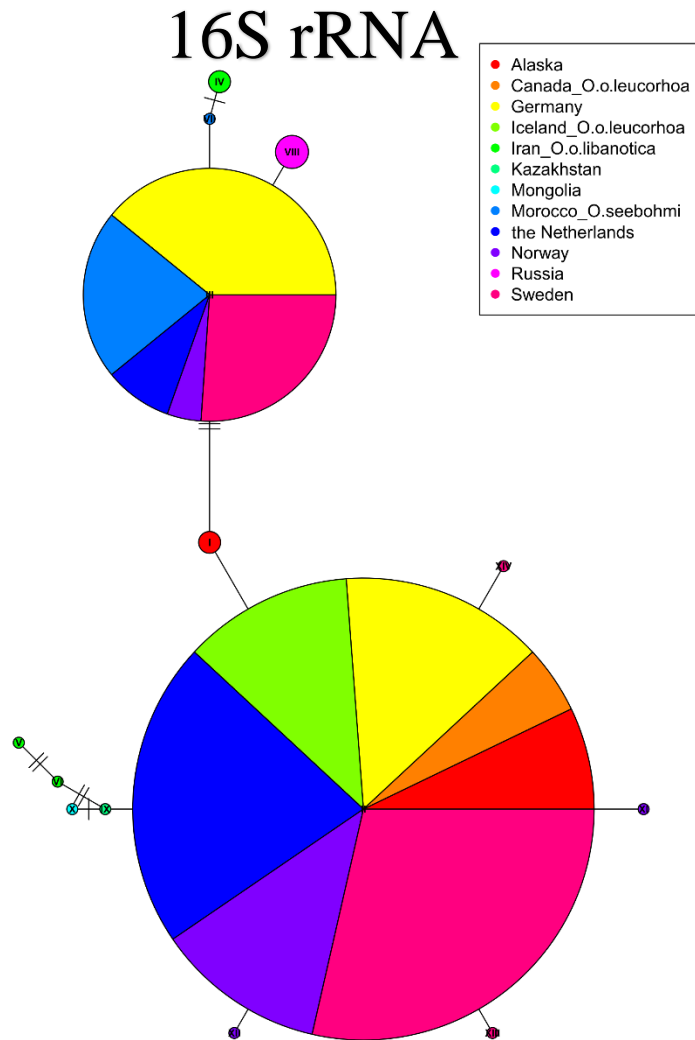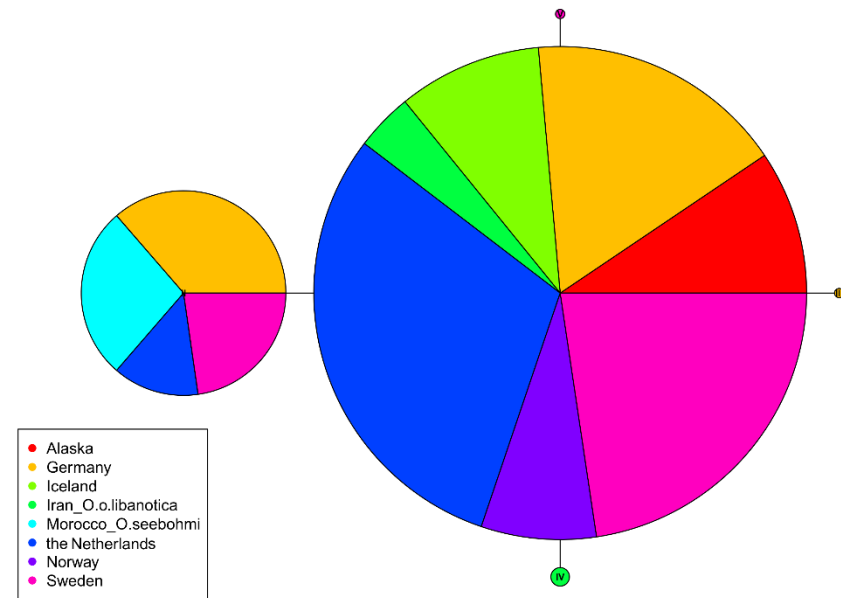

**Figure S5.** Haplotype network for *Oenanthe* including the samples from previous studies. Sample information are shown in the TableS1 and TableS2. Size of the circles represents the frequency of haplotypes. The sample localities are coded by the colors. Each dot indicates one mutation step. Samples from Morocco are Seebohmi Wheatears (*Oenanthe seebohmi*); samples from Iceland and Canada are Greenland Wheatears (*O. o. leucorhoa*); samples from Iran belong to *O. o. libanotica*. The rest of the samples are nominate wheatears (*O. o. oenanthe*). The classification of (sub)species are identified by the morphological data.

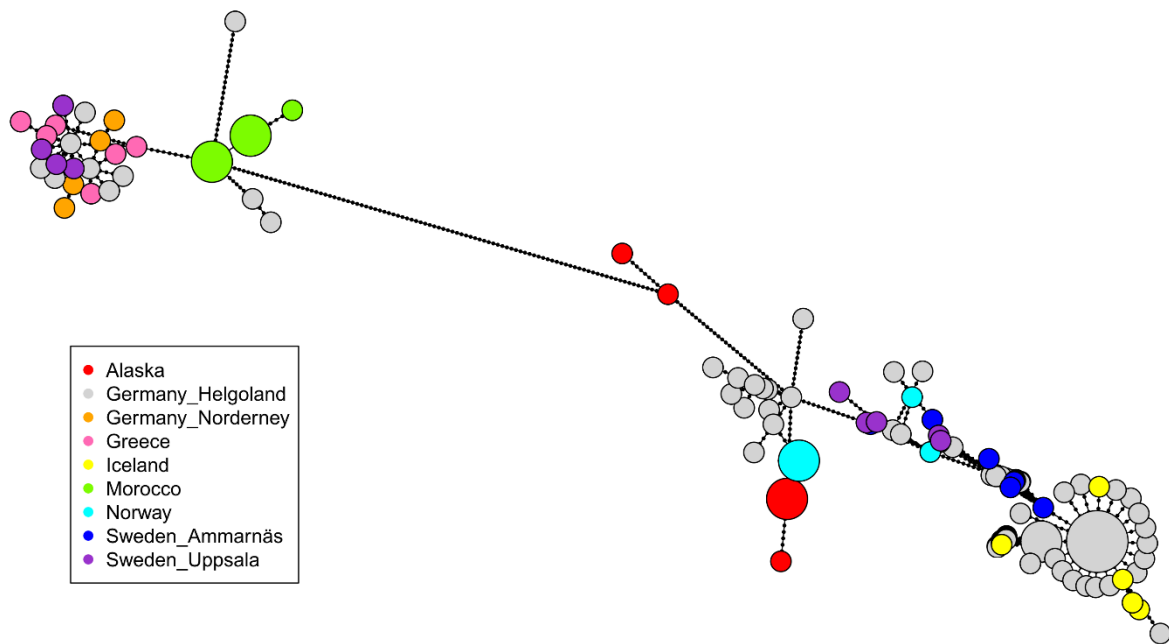

**Figure S6.** Haplotype network for 117 individuals of *Oenanthe* based on 13 PCGs, 14 tRNAs and 2 rRNAs. Size of the circles represents the frequency of haplotypes. The breeding areas are coded by the colors. Each dot indicates one mutation step. Samples from Morocco are Seebohmi Wheatears (*O. seebohmi*); samples from Iceland are Greenland wheatears (*O. o. leucorhoa*); samples from Alaska, Germany, Norway and Sweden are nominate wheatears (*O. o. oenanthe*); samples from Helgoland and Greece are migrating birds. The classification of (sub)species are identified by the morphological data.

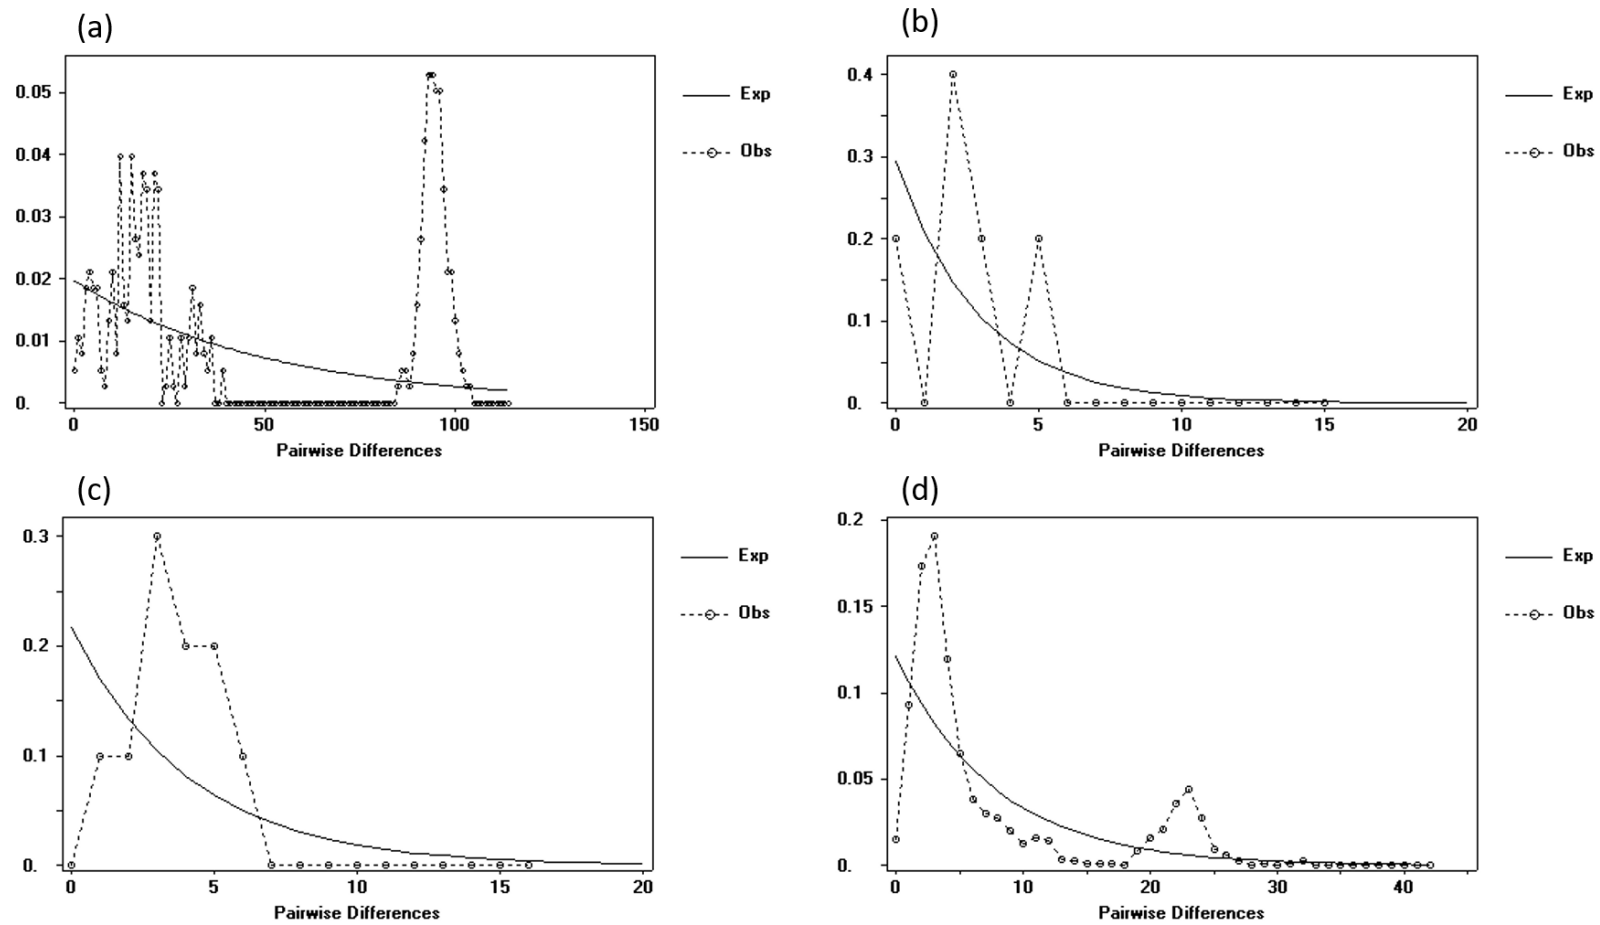

**Figure S7.** Mismatch distribution under the demographic expansion model. The graphs illustrate the frequency of pairwise difference among (a) breeding populations of *O. o. oenanthe*; (b) Morocco population of *O. seebohmi*; (c) Iceland population of *O. o. leucorhoa* and (d) migrating and breeding *O. o. leucorhoa*. based on 13 PCG. We included the migrating *O. o. leucorhoa* for the calculation, because of the limited sample size of breeding population.

**Table S1** Mitochondrial molecular indices of 13 PCG

| taxa                 | population | sample size | No. of polymorphic sites | haplotype diversity | nucleotide diversity | Tajima's D | P values | Fu's    | P values |
|----------------------|------------|-------------|--------------------------|---------------------|----------------------|------------|----------|---------|----------|
| <i>O.o.oenanthe</i>  | Alaska     | 5           | 39                       | 0.9000 ± 0.1610     | 0.1010 ± 0.0631      | 0.7549     | 0.7560   | 2.8224  | 0.8650   |
| <i>O.o.oenanthe</i>  | Germany    | 4           | 6                        | 1.0000 ± 0.1768     | 0.0180 ± 0.0137      | 1.1680     | 0.8350   | -0.9463 | 0.1140   |
| <i>O.o.oenanthe</i>  | Norway     | 4           | 22                       | 0.8333 ± 0.2224     | 0.0679 ± 0.0463      | 1.5698     | 0.9190   | 3.1779  | 0.8790   |
| <i>O.o.oenanthe</i>  | Ammarnäs   | 6           | 24                       | 1.0000 ± 0.0962     | 0.0402 ± 0.0251      | -1.3831    | 0.0560   | -1.2713 | 0.1440   |
| <i>O.o.oenanthe</i>  | Uppsala    | 9           | 124                      | 1.0000 ± 0.0524     | 0.2879 ± 0.1561      | 1.4859     | 0.9520   | 0.2284  | 0.3230   |
| <i>O.o.leucorhoa</i> | Iceland    | 5           | 9                        | 1.0000 ± 0.1265     | 0.0177 ± 0.0126      | -1.1844    | 0.0310   | -1.9011 | 0.0550   |
| <i>O.seebohmi</i>    | Morocco    | 5           | 5                        | 0.8000 ± 0.1640     | 0.0118 ± 0.0090      | 0.0000     | 0.5780   | 0.9518  | 0.6350   |

**Table S2** Sample List

| Species                  | IPMB   | Locality | Country       | Institute of Collector              | GenBank  | Tissue | Status   |
|--------------------------|--------|----------|---------------|-------------------------------------|----------|--------|----------|
| <i>Oenanthe oenanthe</i> | A79846 | Alaska   | United States | Vogelwarte Helgoland, Wilhelmshaven | MT430990 | blood  | Breeding |
| <i>Oenanthe oenanthe</i> | A79847 | Alaska   | United States | Vogelwarte Helgoland, Wilhelmshaven | MT430991 | blood  | Breeding |
| <i>Oenanthe oenanthe</i> | 79848  | Alaska   | United States | Vogelwarte Helgoland, Wilhelmshaven | MT430992 | blood  | Breeding |
| <i>Oenanthe oenanthe</i> | A79849 | Alaska   | United States | Vogelwarte Helgoland, Wilhelmshaven | MT430993 | blood  | Breeding |
| <i>Oenanthe oenanthe</i> | A79850 | Alaska   | United States | Vogelwarte Helgoland, Wilhelmshaven | MT430994 | blood  | Breeding |
| <i>Oenanthe oenanthe</i> | I79851 |          | Iceland       | Vogelwarte Helgoland, Wilhelmshaven | MT430995 | blood  | Breeding |
| <i>Oenanthe oenanthe</i> | I79852 |          | Iceland       | Vogelwarte Helgoland, Wilhelmshaven | MT430996 | blood  | Breeding |
| <i>Oenanthe oenanthe</i> | I79853 |          | Iceland       | Vogelwarte Helgoland, Wilhelmshaven | MT430997 | blood  | Breeding |
| <i>Oenanthe oenanthe</i> | I79854 |          | Iceland       | Vogelwarte Helgoland, Wilhelmshaven | MT430998 | blood  | Breeding |
| <i>Oenanthe oenanthe</i> | I79855 |          | Iceland       | Vogelwarte Helgoland, Wilhelmshaven | MT430999 | blood  | Breeding |
| <i>Oenanthe seebohmi</i> | M79856 |          | Morocco       | Vogelwarte Helgoland, Wilhelmshaven | MT431000 | blood  | Breeding |
| <i>Oenanthe seebohmi</i> | M79857 |          | Morocco       | Vogelwarte Helgoland, Wilhelmshaven | MT431001 | blood  | Breeding |
| <i>Oenanthe seebohmi</i> | M79858 |          | Morocco       | Vogelwarte Helgoland, Wilhelmshaven | MT431002 | blood  | Breeding |
| <i>Oenanthe seebohmi</i> | M79859 |          | Morocco       | Vogelwarte Helgoland, Wilhelmshaven | MT431003 | blood  | Breeding |
| <i>Oenanthe seebohmi</i> | M79860 |          | Morocco       | Vogelwarte Helgoland, Wilhelmshaven | MT431004 | blood  | Breeding |
| <i>Oenanthe oenanthe</i> | N79861 |          | Norway        | Vogelwarte Helgoland, Wilhelmshaven | MT431005 | blood  | Breeding |
| <i>Oenanthe oenanthe</i> | N79863 |          | Norway        | Vogelwarte Helgoland, Wilhelmshaven | MT431006 | blood  | Breeding |

|                          |        |           |         |                                                                   |          |       |          |
|--------------------------|--------|-----------|---------|-------------------------------------------------------------------|----------|-------|----------|
| <i>Oenanthe oenanthe</i> | N79864 |           | Norway  | Vogelwarte Helgoland, Wilhelmshaven                               | MT431007 | blood | Breeding |
| <i>Oenanthe oenanthe</i> | N79865 |           | Norway  | Vogelwarte Helgoland, Wilhelmshaven                               | MT431008 | blood | Breeding |
| <i>Oenanthe oenanthe</i> | D94163 | Norderney | Germany | Vogelwarte Helgoland, Wilhelmshaven, Heiko Schmaljohann           | MT431009 | blood | Breeding |
| <i>Oenanthe oenanthe</i> | D94166 | Norderney | Germany | Vogelwarte Helgoland, Wilhelmshaven, Heiko Schmaljohann           | MT431010 | blood | Breeding |
| <i>Oenanthe oenanthe</i> | D94168 | Norderney | Germany | Vogelwarte Helgoland, Wilhelmshaven, Heiko Schmaljohann           | MT431011 | blood | Breeding |
| <i>Oenanthe oenanthe</i> | D94169 | Norderney | Germany | Vogelwarte Helgoland, Wilhelmshaven, Heiko Schmaljohann           | MT431012 | blood | Breeding |
| <i>Oenanthe oenanthe</i> | S94215 | Ammarnäs  | Sweden  | Department of Ecology, Swedish University of Agricultural Science | MT431013 | blood | Breeding |
| <i>Oenanthe oenanthe</i> | S94217 | Ammarnäs  | Sweden  | Department of Ecology, Swedish University of Agricultural Science | MT431014 | blood | Breeding |
| <i>Oenanthe oenanthe</i> | S94218 | Ammarnäs  | Sweden  | Department of Ecology, Swedish University of Agricultural Science | MT431015 | blood | Breeding |
| <i>Oenanthe oenanthe</i> | S94219 | Ammarnäs  | Sweden  | Department of Ecology, Swedish University of Agricultural Science | MT431016 | blood | Breeding |
| <i>Oenanthe oenanthe</i> | S94220 | Ammarnäs  | Sweden  | Department of Ecology, Swedish University of Agricultural Science | MT431017 | blood | Breeding |
| <i>Oenanthe oenanthe</i> | S94221 | Ammarnäs  | Sweden  | Department of Ecology, Swedish University of Agricultural Science | MT431018 | blood | Breeding |
| <i>Oenanthe oenanthe</i> | S94222 | Uppsala   | Sweden  | Department of Ecology, Swedish University of Agricultural Science | MT431019 | blood | Breeding |
| <i>Oenanthe oenanthe</i> | S94223 | Uppsala   | Sweden  | Department of Ecology, Swedish University of Agricultural Science | MT431020 | blood | Breeding |
| <i>Oenanthe oenanthe</i> | S94224 | Uppsala   | Sweden  | Department of Ecology, Swedish University of Agricultural Science | MT431021 | blood | Breeding |
| <i>Oenanthe oenanthe</i> | S94225 | Uppsala   | Sweden  | Department of Ecology, Swedish University of Agricultural Science | MT431022 | blood | Breeding |
| <i>Oenanthe oenanthe</i> | S94226 | Uppsala   | Sweden  | Department of Ecology, Swedish University of Agricultural Science | MT431023 | blood | Breeding |
| <i>Oenanthe oenanthe</i> | S94227 | Uppsala   | Sweden  | Department of Ecology, Swedish University of Agricultural Science | MT431024 | blood | Breeding |
| <i>Oenanthe oenanthe</i> | S94228 | Uppsala   | Sweden  | Department of Ecology, Swedish University of Agricultural Science | MT431025 | blood | Breeding |



|                          |        |           |         |                                                                   |          |       |          |
|--------------------------|--------|-----------|---------|-------------------------------------------------------------------|----------|-------|----------|
| <i>Oenanthe oenanthe</i> | S94229 | Uppsala   | Sweden  | Department of Ecology, Swedish University of Agricultural Science | MT431026 | blood | Breeding |
| <i>Oenanthe oenanthe</i> | S94231 | Uppsala   | Sweden  | Department of Ecology, Swedish University of Agricultural Science | MT431027 | blood | Breeding |
| <i>Oenanthe oenanthe</i> | H93275 | Helgoland | Germany | Vogelwarte Helgoland, Wilhelmshaven, Heiko Schmaljohann           | MT431028 | blood | Migrant  |
| <i>Oenanthe oenanthe</i> | H93276 | Helgoland | Germany | Vogelwarte Helgoland, Wilhelmshaven, Heiko Schmaljohann           | MT431029 | blood | Migrant  |
| <i>Oenanthe oenanthe</i> | H93277 | Helgoland | Germany | Vogelwarte Helgoland, Wilhelmshaven, Heiko Schmaljohann           | MT431030 | blood | Migrant  |
| <i>Oenanthe oenanthe</i> | H93278 | Helgoland | Germany | Vogelwarte Helgoland, Wilhelmshaven, Heiko Schmaljohann           | MT431031 | blood | Migrant  |
| <i>Oenanthe oenanthe</i> | H93279 | Helgoland | Germany | Vogelwarte Helgoland, Wilhelmshaven, Heiko Schmaljohann           | MT431032 | blood | Migrant  |
| <i>Oenanthe oenanthe</i> | H93280 | Helgoland | Germany | Vogelwarte Helgoland, Wilhelmshaven, Heiko Schmaljohann           | MT431033 | blood | Migrant  |
| <i>Oenanthe oenanthe</i> | H93283 | Helgoland | Germany | Vogelwarte Helgoland, Wilhelmshaven, Heiko Schmaljohann           | MT431034 | blood | Migrant  |
| <i>Oenanthe oenanthe</i> | H93285 | Helgoland | Germany | Vogelwarte Helgoland, Wilhelmshaven, Heiko Schmaljohann           | MT431035 | blood | Migrant  |
| <i>Oenanthe oenanthe</i> | H93286 | Helgoland | Germany | Vogelwarte Helgoland, Wilhelmshaven, Heiko Schmaljohann           | MT431036 | blood | Migrant  |
| <i>Oenanthe oenanthe</i> | H93287 | Helgoland | Germany | Vogelwarte Helgoland, Wilhelmshaven, Heiko Schmaljohann           | MT431037 | blood | Migrant  |
| <i>Oenanthe oenanthe</i> | H93288 | Helgoland | Germany | Vogelwarte Helgoland, Wilhelmshaven, Heiko Schmaljohann           | MT431038 | blood | Migrant  |
| <i>Oenanthe oenanthe</i> | H93289 | Helgoland | Germany | Vogelwarte Helgoland, Wilhelmshaven, Heiko Schmaljohann           | MT431039 | blood | Migrant  |
| <i>Oenanthe oenanthe</i> | H93291 | Helgoland | Germany | Vogelwarte Helgoland, Wilhelmshaven, Heiko Schmaljohann           | MT431040 | blood | Migrant  |
| <i>Oenanthe oenanthe</i> | H93292 | Helgoland | Germany | Vogelwarte Helgoland, Wilhelmshaven, Heiko Schmaljohann           | MT431041 | blood | Migrant  |
| <i>Oenanthe oenanthe</i> | H93293 | Helgoland | Germany | Vogelwarte Helgoland, Wilhelmshaven, Heiko Schmaljohann           | MT431042 | blood | Migrant  |
| <i>Oenanthe oenanthe</i> | H93294 | Helgoland | Germany | Vogelwarte Helgoland, Wilhelmshaven, Heiko Schmaljohann           | MT431043 | blood | Migrant  |
| <i>Oenanthe oenanthe</i> | H93295 | Helgoland | Germany | Vogelwarte Helgoland, Wilhelmshaven, Heiko Schmaljohann           | MT431044 | blood | Migrant  |

|                          |        |           |         |                                                         |          |       |         |
|--------------------------|--------|-----------|---------|---------------------------------------------------------|----------|-------|---------|
| <i>Oenanthe oenanthe</i> | H93296 | Helgoland | Germany | Vogelwarte Helgoland, Wilhelmshaven, Heiko Schmaljohann | MT431045 | blood | Migrant |
| <i>Oenanthe oenanthe</i> | H93299 | Helgoland | Germany | Vogelwarte Helgoland, Wilhelmshaven, Heiko Schmaljohann | MT431046 | blood | Migrant |
| <i>Oenanthe oenanthe</i> | H93300 | Helgoland | Germany | Vogelwarte Helgoland, Wilhelmshaven, Heiko Schmaljohann | MT431047 | blood | Migrant |
| <i>Oenanthe oenanthe</i> | H93301 | Helgoland | Germany | Vogelwarte Helgoland, Wilhelmshaven, Heiko Schmaljohann | MT431048 | blood | Migrant |
| <i>Oenanthe oenanthe</i> | H93302 | Helgoland | Germany | Vogelwarte Helgoland, Wilhelmshaven, Heiko Schmaljohann | MT431049 | blood | Migrant |
| <i>Oenanthe oenanthe</i> | H93303 | Helgoland | Germany | Vogelwarte Helgoland, Wilhelmshaven, Heiko Schmaljohann | MT431050 | blood | Migrant |
| <i>Oenanthe oenanthe</i> | H93304 | Helgoland | Germany | Vogelwarte Helgoland, Wilhelmshaven, Heiko Schmaljohann | MT431051 | blood | Migrant |
| <i>Oenanthe oenanthe</i> | H93305 | Helgoland | Germany | Vogelwarte Helgoland, Wilhelmshaven, Heiko Schmaljohann | MT431052 | blood | Migrant |
| <i>Oenanthe oenanthe</i> | H93306 | Helgoland | Germany | Vogelwarte Helgoland, Wilhelmshaven, Heiko Schmaljohann | MT431053 | blood | Migrant |
| <i>Oenanthe oenanthe</i> | H93307 | Helgoland | Germany | Vogelwarte Helgoland, Wilhelmshaven, Heiko Schmaljohann | MT431054 | blood | Migrant |
| <i>Oenanthe oenanthe</i> | H93309 | Helgoland | Germany | Vogelwarte Helgoland, Wilhelmshaven, Heiko Schmaljohann | MT431055 | blood | Migrant |
| <i>Oenanthe oenanthe</i> | H93310 | Helgoland | Germany | Vogelwarte Helgoland, Wilhelmshaven, Heiko Schmaljohann | MT431056 | blood | Migrant |
| <i>Oenanthe oenanthe</i> | H93311 | Helgoland | Germany | Vogelwarte Helgoland, Wilhelmshaven, Heiko Schmaljohann | MT431057 | blood | Migrant |
| <i>Oenanthe oenanthe</i> | H93312 | Helgoland | Germany | Vogelwarte Helgoland, Wilhelmshaven, Heiko Schmaljohann | MT431058 | blood | Migrant |
| <i>Oenanthe oenanthe</i> | H93314 | Helgoland | Germany | Vogelwarte Helgoland, Wilhelmshaven, Heiko Schmaljohann | MT431059 | blood | Migrant |
| <i>Oenanthe oenanthe</i> | H93315 | Helgoland | Germany | Vogelwarte Helgoland, Wilhelmshaven, Heiko Schmaljohann | MT431060 | blood | Migrant |
| <i>Oenanthe oenanthe</i> | H93316 | Helgoland | Germany | Vogelwarte Helgoland, Wilhelmshaven, Heiko Schmaljohann | MT431061 | blood | Migrant |
| <i>Oenanthe oenanthe</i> | H93317 | Helgoland | Germany | Vogelwarte Helgoland, Wilhelmshaven, Heiko Schmaljohann | MT431062 | blood | Migrant |
| <i>Oenanthe oenanthe</i> | H93318 | Helgoland | Germany | Vogelwarte Helgoland, Wilhelmshaven, Heiko Schmaljohann | MT431063 | blood | Migrant |

|                          |        |           |         |                                                         |          |       |         |
|--------------------------|--------|-----------|---------|---------------------------------------------------------|----------|-------|---------|
| <i>Oenanthe oenanthe</i> | H93319 | Helgoland | Germany | Vogelwarte Helgoland, Wilhelmshaven, Heiko Schmaljohann | MT431064 | blood | Migrant |
| <i>Oenanthe oenanthe</i> | H93320 | Helgoland | Germany | Vogelwarte Helgoland, Wilhelmshaven, Heiko Schmaljohann | MT431065 | blood | Migrant |
| <i>Oenanthe oenanthe</i> | H93321 | Helgoland | Germany | Vogelwarte Helgoland, Wilhelmshaven, Heiko Schmaljohann | MT431066 | blood | Migrant |
| <i>Oenanthe oenanthe</i> | H93322 | Helgoland | Germany | Vogelwarte Helgoland, Wilhelmshaven, Heiko Schmaljohann | MT431067 | blood | Migrant |
| <i>Oenanthe oenanthe</i> | H93323 | Helgoland | Germany | Vogelwarte Helgoland, Wilhelmshaven, Heiko Schmaljohann | MT431068 | blood | Migrant |
| <i>Oenanthe oenanthe</i> | H93324 | Helgoland | Germany | Vogelwarte Helgoland, Wilhelmshaven, Heiko Schmaljohann | MT431069 | blood | Migrant |
| <i>Oenanthe oenanthe</i> | H93325 | Helgoland | Germany | Vogelwarte Helgoland, Wilhelmshaven, Heiko Schmaljohann | MT431070 | blood | Migrant |
| <i>Oenanthe oenanthe</i> | H93326 | Helgoland | Germany | Vogelwarte Helgoland, Wilhelmshaven, Heiko Schmaljohann | MT431071 | blood | Migrant |
| <i>Oenanthe oenanthe</i> | H93327 | Helgoland | Germany | Vogelwarte Helgoland, Wilhelmshaven, Heiko Schmaljohann | MT431072 | blood | Migrant |
| <i>Oenanthe oenanthe</i> | H93328 | Helgoland | Germany | Vogelwarte Helgoland, Wilhelmshaven, Heiko Schmaljohann | MT431073 | blood | Migrant |
| <i>Oenanthe oenanthe</i> | H93331 | Helgoland | Germany | Vogelwarte Helgoland, Wilhelmshaven, Heiko Schmaljohann | MT431074 | blood | Migrant |
| <i>Oenanthe oenanthe</i> | H93332 | Helgoland | Germany | Vogelwarte Helgoland, Wilhelmshaven, Heiko Schmaljohann | MT431075 | blood | Migrant |
| <i>Oenanthe oenanthe</i> | H93333 | Helgoland | Germany | Vogelwarte Helgoland, Wilhelmshaven, Heiko Schmaljohann | MT431076 | blood | Migrant |
| <i>Oenanthe oenanthe</i> | H93334 | Helgoland | Germany | Vogelwarte Helgoland, Wilhelmshaven, Heiko Schmaljohann | MT431077 | blood | Migrant |
| <i>Oenanthe oenanthe</i> | H93335 | Helgoland | Germany | Vogelwarte Helgoland, Wilhelmshaven, Heiko Schmaljohann | MT431078 | blood | Migrant |
| <i>Oenanthe oenanthe</i> | H93336 | Helgoland | Germany | Vogelwarte Helgoland, Wilhelmshaven, Heiko Schmaljohann | MT431079 | blood | Migrant |
| <i>Oenanthe oenanthe</i> | H93337 | Helgoland | Germany | Vogelwarte Helgoland, Wilhelmshaven, Heiko Schmaljohann | MT431080 | blood | Migrant |
| <i>Oenanthe oenanthe</i> | H93338 | Helgoland | Germany | Vogelwarte Helgoland, Wilhelmshaven, Heiko Schmaljohann | MT431081 | blood | Migrant |
| <i>Oenanthe oenanthe</i> | H93339 | Helgoland | Germany | Vogelwarte Helgoland, Wilhelmshaven, Heiko Schmaljohann | MT431082 | blood | Migrant |

|                          |        |           |         |                                                         |          |        |         |
|--------------------------|--------|-----------|---------|---------------------------------------------------------|----------|--------|---------|
| <i>Oenanthe oenanthe</i> | H93340 | Helgoland | Germany | Vogelwarte Helgoland, Wilhelmshaven, Heiko Schmaljohann | MT431083 | blood  | Migrant |
| <i>Oenanthe oenanthe</i> | H93341 | Helgoland | Germany | Vogelwarte Helgoland, Wilhelmshaven, Heiko Schmaljohann | MT431084 | blood  | Migrant |
| <i>Oenanthe oenanthe</i> | H93342 | Helgoland | Germany | Vogelwarte Helgoland, Wilhelmshaven, Heiko Schmaljohann | MT431085 | blood  | Migrant |
| <i>Oenanthe oenanthe</i> | H93343 | Helgoland | Germany | Vogelwarte Helgoland, Wilhelmshaven, Heiko Schmaljohann | MT431086 | blood  | Migrant |
| <i>Oenanthe oenanthe</i> | H93344 | Helgoland | Germany | Vogelwarte Helgoland, Wilhelmshaven, Heiko Schmaljohann | MT431087 | blood  | Migrant |
| <i>Oenanthe oenanthe</i> | H93345 | Helgoland | Germany | Vogelwarte Helgoland, Wilhelmshaven, Heiko Schmaljohann | MT431088 | blood  | Migrant |
| <i>Oenanthe oenanthe</i> | H93346 | Helgoland | Germany | Vogelwarte Helgoland, Wilhelmshaven, Heiko Schmaljohann | MT431089 | blood  | Migrant |
| <i>Oenanthe oenanthe</i> | H93347 | Helgoland | Germany | Vogelwarte Helgoland, Wilhelmshaven, Heiko Schmaljohann | MT431090 | blood  | Migrant |
| <i>Oenanthe oenanthe</i> | H93348 | Helgoland | Germany | Vogelwarte Helgoland, Wilhelmshaven, Heiko Schmaljohann | MT431091 | blood  | Migrant |
| <i>Oenanthe oenanthe</i> | H93349 | Helgoland | Germany | Vogelwarte Helgoland, Wilhelmshaven, Heiko Schmaljohann | MT431092 | blood  | Migrant |
| <i>Oenanthe oenanthe</i> | H93350 | Helgoland | Germany | Vogelwarte Helgoland, Wilhelmshaven, Heiko Schmaljohann | MT431093 | blood  | Migrant |
| <i>Oenanthe oenanthe</i> | H93351 | Helgoland | Germany | Vogelwarte Helgoland, Wilhelmshaven, Heiko Schmaljohann | MT431094 | blood  | Migrant |
| <i>Oenanthe oenanthe</i> | H93352 | Helgoland | Germany | Vogelwarte Helgoland, Wilhelmshaven, Heiko Schmaljohann | MT431095 | blood  | Migrant |
| <i>Oenanthe oenanthe</i> | H93353 | Helgoland | Germany | Vogelwarte Helgoland, Wilhelmshaven, Heiko Schmaljohann | MT431096 | blood  | Migrant |
| <i>Oenanthe oenanthe</i> | H93355 | Helgoland | Germany | Vogelwarte Helgoland, Wilhelmshaven, Heiko Schmaljohann | MT431097 | blood  | Migrant |
| <i>Oenanthe oenanthe</i> | H93356 | Helgoland | Germany | Vogelwarte Helgoland, Wilhelmshaven, Heiko Schmaljohann | MT431098 | blood  | Migrant |
| <i>Oenanthe oenanthe</i> | H93357 | Helgoland | Germany | Vogelwarte Helgoland, Wilhelmshaven, Heiko Schmaljohann | MT431099 | blood  | Migrant |
| <i>Oenanthe oenanthe</i> | H93358 | Helgoland | Germany | Vogelwarte Helgoland, Wilhelmshaven, Heiko Schmaljohann | MT431100 | blood  | Migrant |
| <i>Oenanthe oenanthe</i> | G2265  | Crete     | Greece  | Ristow                                                  | MT431101 | Tissue | Migrant |

|                            |        |       |        |                   |          |        |         |
|----------------------------|--------|-------|--------|-------------------|----------|--------|---------|
| <i>Oenanthe oenanthe</i>   | G2269  | Crete | Greece | Ristow            | MT431102 | Tissue | Migrant |
| <i>Oenanthe oenanthe</i>   | G8605  | Kreta | Greece | Ristow            | MT431103 | Tissue | Migrant |
| <i>Oenanthe oenanthe</i>   | G11501 | Kreta | Greece | Ristow            | MT431104 | Tissue | Migrant |
| <i>Oenanthe oenanthe</i>   | G19615 | Crete | Greece | Ristow            | MT431105 | Tissue | Migrant |
| <i>Oenanthe oenanthe</i>   | G19616 | Crete | Greece | Ristow            | MT431106 | Tissue | Migrant |
| <i>Oenanthe isabellina</i> | O4325  |       | Israel | Wittmann/Heidrich |          | Tissue | Unknown |

**Table S3** Information about the sequences in the study obtained from GenBank

| Reference                 | Species                 | Sample no.       | Location    | GenBank accession<br>16S | GenBank accession<br>COX1 |
|---------------------------|-------------------------|------------------|-------------|--------------------------|---------------------------|
| Randler, 2012/Hebert,2004 | <i>O. oenanthe</i>      | 1B-3210          | Canada      |                          | AY666389                  |
| Randler, 2012/Kerr,2007   | <i>O. oenanthe</i>      | USNM 627617      | Iceland     |                          | DQ433051.1                |
| Aliabadian,2007           | <i>O. o. libanotica</i> | BMNH A/2005.2.9  | Iran        | DQ683467                 | DQ683501                  |
| Aliabadian,2007           | <i>O. o. libanotica</i> | BMNH A/2005.2.4  | Iran        | DQ683468                 | DQ683502                  |
| Aliabadian,2007           | <i>O. o. libanotica</i> | MIUT2003-81      | Iran        | DQ683469                 | DQ683503                  |
| Aliabadian,2007           | <i>O. o. libanotica</i> | BMNH A/2005.2.10 | Iran        | DQ683470                 | DQ683504                  |
| Aliabadian,2007           | <i>O. seebohmi</i>      | MIUT2003-83      | Morocco     | DQ683471                 | DQ683505                  |
| van Oosten,2016           | <i>O. oenanthe</i>      | WE13 005         | Netherlands | KX352414.1               | KX352390.1                |
| van Oosten,2016           | <i>O. oenanthe</i>      | WE13 007         | Netherlands | KX352415.1               | KX352391.1                |
| van Oosten,2016           | <i>O. oenanthe</i>      | WE13 015         | Netherlands | KX352416.1               |                           |
| van Oosten,2016           | <i>O. oenanthe</i>      | WE13 024         | Netherlands | KX352417.1               | KX352392.1                |
| van Oosten,2016           | <i>O. oenanthe</i>      | WE13 029         | Netherlands | KX352418.1               | KX352393.1                |
| van Oosten,2016           | <i>O. oenanthe</i>      | WE13 054         | Netherlands | KX352419.1               | KX352394.1                |
| van Oosten,2016           | <i>O. oenanthe</i>      | WE13 065         | Netherlands | KX352420.1               |                           |
| van Oosten,2016           | <i>O. oenanthe</i>      | WE13 075         | Netherlands | KX352421.1               | KX352395.1                |
| van Oosten,2016           | <i>O. oenanthe</i>      | WE13 080         | Netherlands | KX352422.1               | KX352396.1                |
| van Oosten,2016           | <i>O. oenanthe</i>      | WE13 088         | Netherlands | KX352423.1               | KX352397.1                |
| van Oosten,2016           | <i>O. oenanthe</i>      | WE13 104         | Netherlands | KX352424.1               | KX352398.1                |
| van Oosten,2016           | <i>O. oenanthe</i>      | WE13 111         | Netherlands | KX352425.1               |                           |
| van Oosten,2016           | <i>O. oenanthe</i>      | WE13 114         | Netherlands | KX352426.1               |                           |
| van Oosten,2016           | <i>O. oenanthe</i>      | WE13 123         | Netherlands | KX352427.1               | KX352399.1                |
| van Oosten,2016           | <i>O. oenanthe</i>      | WE13 133         | Netherlands | KX352428.1               | KX352400.1                |
| van Oosten,2016           | <i>O. oenanthe</i>      | WE13 143         | Netherlands | KX352429.1               | KX352401.1                |
| van Oosten,2016           | <i>O. oenanthe</i>      | WE13 149         | Netherlands | KX352430.1               | KX352402.1                |
| van Oosten,2016           | <i>O. oenanthe</i>      | WE13 155         | Netherlands | KX352431.1               | KX352403.1                |

|                 |                      |          |                     |                                          |            |
|-----------------|----------------------|----------|---------------------|------------------------------------------|------------|
| van Oosten,2016 | <i>O. oenanthe</i>   | WE13 161 | Netherlands         | KX352432.1                               | KX352404.1 |
| van Oosten,2016 | <i>O. oenanthe</i>   | WE13 167 | Germany             | KX352433.1                               | KX352405.1 |
| van Oosten,2016 | <i>O. oenanthe</i>   | WE13 172 | Germany             | KX352434.1                               |            |
| van Oosten,2016 | <i>O. oenanthe</i>   | WE13 176 | Germany             | KX352435.1                               | KX352406.1 |
| van Oosten,2016 | <i>O. oenanthe</i>   | WE13 177 | Germany             | KX352436.1                               | KX352407.1 |
| van Oosten,2016 | <i>O. oenanthe</i>   | WE13 181 | Germany             | KX352437.1                               | KX352408.1 |
| van Oosten,2016 | <i>O. oenanthe</i>   | WE13 184 | Germany             | KX352438.1                               | KX352409.1 |
| van Oosten,2016 | <i>O. oenanthe</i>   | WE13 193 | Germany             | KX352439.1                               | KX352410.1 |
| van Oosten,2016 | <i>O. oenanthe</i>   | WE13 201 | Germany             | KX352440.1                               | KX352411.1 |
| van Oosten,2016 | <i>O. oenanthe</i>   | WE13 204 | Germany             | KX352441.1                               | KX352412.1 |
| van Oosten,2016 | <i>O. oenanthe</i>   | WE13 212 | Germany             | KX352442.1                               | KX352413.1 |
| Johnsen,2010    | <i>O. oenanthe</i>   |          | Sweden_Uppsala      |                                          | GU571994.1 |
| Johnsen,2010    | <i>O. oenanthe</i>   |          | Sweden_Orebro       |                                          | GU571993.1 |
| Johnsen,2010    | <i>O. oenanthe</i>   |          | Norway_Telemark     |                                          | GU571512.1 |
| Johnsen,2010    | <i>O. oenanthe</i>   |          | Norway_Oppland      |                                          | GU571511.1 |
| Johnsen,2010    | <i>O. oenanthe</i>   |          | Norway_Rogaland     |                                          | GU571510.1 |
| Johnsen,2010    | <i>O. oenanthe</i>   |          | Norway_Vest-Agder   |                                          | GU571509.1 |
| Kerr, 2009      | <i>O. oenanthe</i>   |          | Mongolia_Dzavhan    |                                          | GQ482270.1 |
| Kerr, 2009      | <i>O. oenanthe</i>   |          | Russia_Rossiia      |                                          | GQ482266.1 |
| Kerr, 2009      | <i>O. oenanthe</i>   |          | Russia_Rossiia      |                                          | GQ482269.1 |
| Kerr, 2009      | <i>O. oenanthe</i>   |          | Kazakhstan          |                                          | GQ482268.1 |
| Kerr, 2009      | <i>O. oenanthe</i>   |          | Russia_Magadanskaya |                                          | GQ482267.1 |
| Li, 2016        | <i>O. isabellina</i> |          | China_Qinghai       | Complete mitochondria genome NC_040290.1 |            |
